# Supplementary material for: World Atlas of late Quaternary Foraminiferal Oxygen and Carbon Isotope Ratios
Source: Copernicus journal article supplement (doi:10.5194/essd-2021-337), 2021-11-25
Supplement: Supplementary file [file essd-2021-337-AC3-supplement.pdf]

### **Response to comments by Reviewer #3 (Stefano Bernasconi)**

***1) This paper describes a new world atlas of foraminifera oxygen and carbon isotopes. This is a very welcome and extremely useful contribution to the paleoceanographic community and will be a very much used tool in the future. The authors have to be commended for the great effort to put this atlas together.***

We thank Stefano Bernasconi for his helpful review and encouraging comments. Our responses (plain text) are listed after the Stefano Bernasconi's comments (text in italic font).

***2) The paper is very well written and to the point. It provides the necessary information to use the database, although at present it was not possible for me to access the database. I assume the link will be activated once the paper is accepted.***

We are sorry that the access to the data was more difficult than expected. A temporary download link is available on the article page under "Assets". This link provides free access to the atlas data set on Pangaea until Feb 20, 2022 and our tests confirmed that it was indeed active during the discussion phase. We noticed, however, that the PANGAEA website still states "login required" which does not apply to the link but may restrain interested colleagues from clicking on the link under "Download dataset". All restrictions on the data set will be completely lifted upon acceptance of the paper. To make the use of the data set more convenient, we furthermore plan to distribute the data set with the installer. We added the following corresponding statement to section 5 (data availability) of the manuscript:

"Installers for current versions of PDV for both Windows 10 and macOS including the data set are available from <https://www.marum.de/Stefan-Mulitza/PaleoDataView.html> (last access: 2 February 2022)."

***3) The last chapter does not clearly describe if the database is open to additional data and if yes how they can be supplied to the authors, or if the authors plan a updated version in the future, rather than a continuous incorporation of new data as they are provided by other contributors.***

This important point was also raised by Reviewer #2 (see comment #6 and our response). We indeed plan to update the data set in the future and hope that our manuscript will stimulate the interest of the community to participate and contribute data to updated products. We added information on how data can be submitted, as well as a sentence describing our future plans to update the data set to section 6.

***Very nice piece of work, that can essentially be published with only very minor improvements in the last chapter.***
